# Supplementary material
Source: PubMed Central journal article supplement (PMC5514457)
Supplement: MCB.00202-17_zmb015171552s1.pdf [file MCB.00202-17_zmb015171552s1.pdf]

## SUPPLEMENTAL FIGURES AND LEGENDS

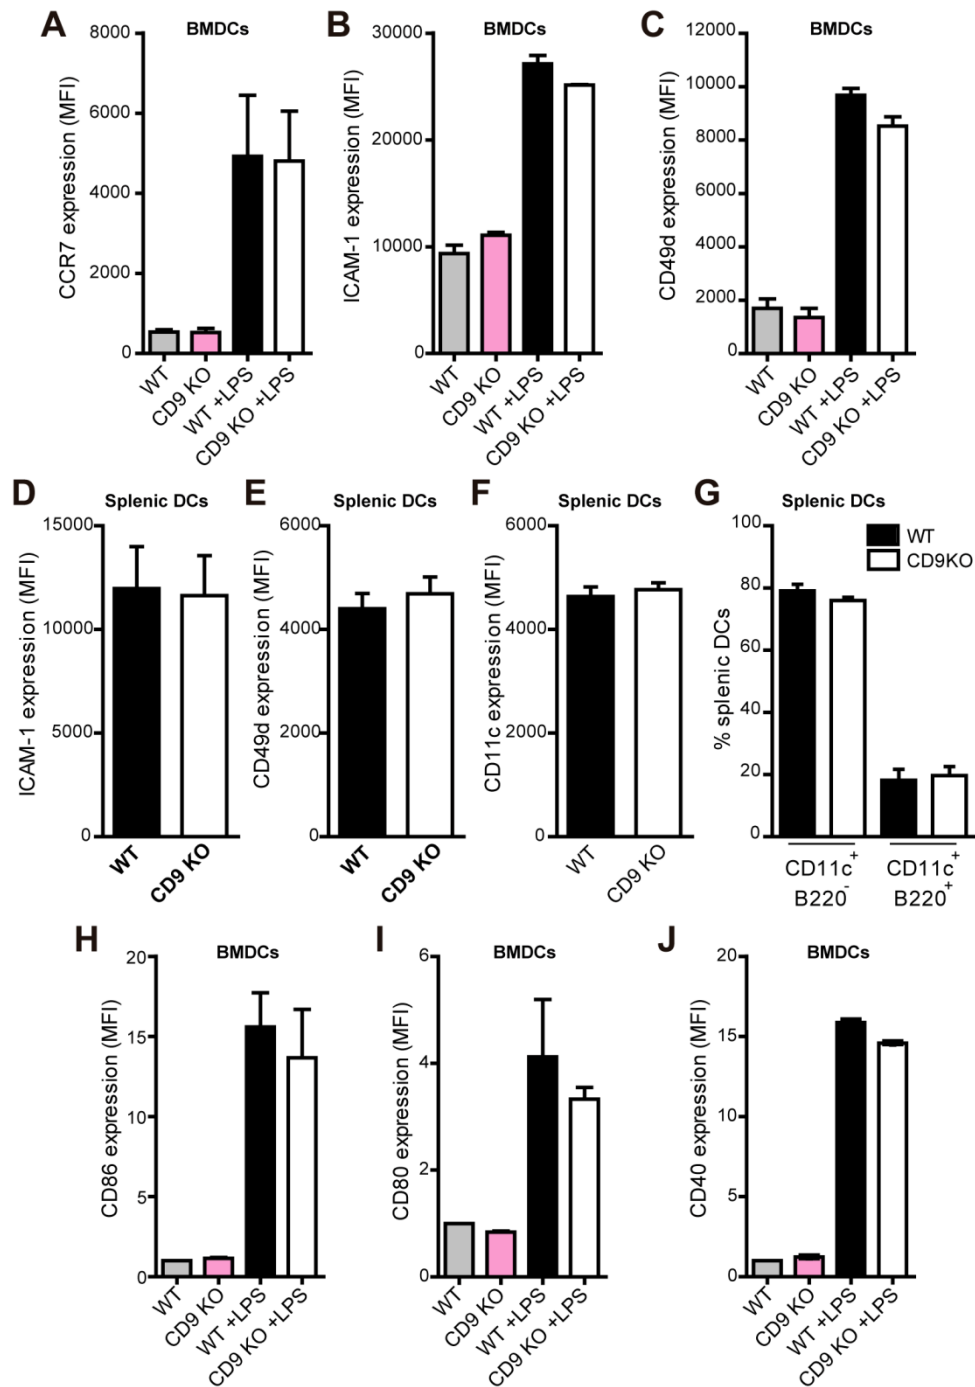

## Supplemental Figure 1

Supp. Fig. 1. CD9 deficiency does not affect surface expression of several surface markers.

Immature and LPS-matured CD11c<sup>+</sup> WT and CD9 KO GM-CSF-dependent BMDCs (thereafter called MoDCs) were stained for with different antibodies against (A) CCR7, (B) ICAM-1, (C) CD49d, (H)

CD86, (I) CD80, and (J) CD40, and analyzed by flow cytometry. Splenic WT and CD9 KO DCs were stained for with different antibodies against (D) ICAM-1, (E) CD49d, (F) CD11b, and (G) CD11c and B220 to differentiate plasmacytoid and conventional DCs. (A-C; H-J) Data are mean-fold induction  $\pm$  SEM from two independent experiments analyzed by one-way ANOVA with Tukey's post-hoc multiple comparison test, and (D-G) means  $\pm$  SEM of two independent experiments analyzed by Student *t*-test.

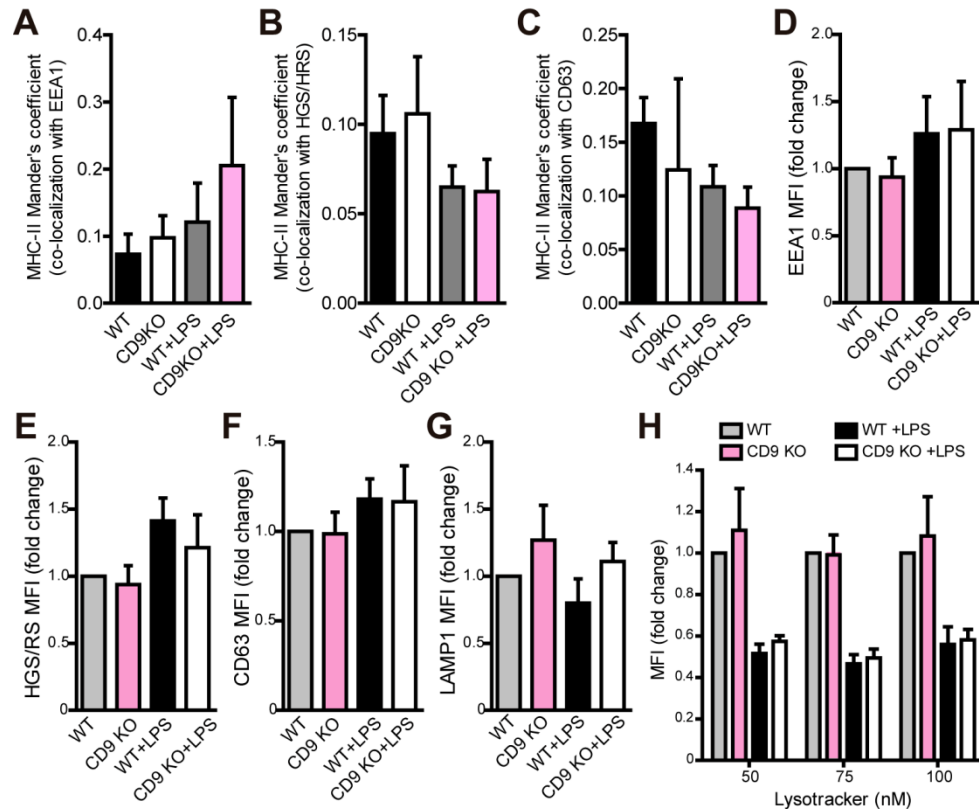

## Supplemental Figure 2

**Supp. Fig. 2. CD9 deficiency does not modify the expression levels of different markers of intracellular vesicles.** (A-C) Immature or LPS-matured WT and CD9 KO MoDCs were plated onto PLL-coated coverslips, fixed, permeabilized, stained for with antibodies against MHC-II and (A) EEA1, (B) HGS/HRS, or (C) CD63, and analyzed by confocal microscopy. Graphs show the quantification of (A) EEA1-MHC-II, (B) HGS/HRS-MHC-II, or (C) CD63-MHC-II co-localization performed in 3D stack confocal microscopy images, and quantified by Mander's coefficient. Data are means  $\pm$  SEM of three independent experiments (A, at least n=100 immature and 40 mature cells; B, at least n=85 immature and mature cells; C, at least n=25 immature and 20 mature cells) analyzed by one-way ANOVA with Tukey's post-hoc multiple comparison test. (D-G) Immature and LPS-matured CD11c<sup>+</sup>MHC-II<sup>+</sup> WT and CD9 KO

DCs were fixed, permeabilized, stained for with different antibodies against (D) EEA1, (E) HGS/HRS, (F) CD63, (G) LAMP1, and analyzed by flow cytometry. Graphs show the mean-fold induction  $\pm$  SEM of three independent experiments analyzed by one-way ANOVA with Tukey's post-hoc multiple comparison test. (H) Immature and LPS-matured WT and CD9 KO DCs were loaded with different concentrations of LysoTracker Red for 30min at 37°C, washed, stained for with antibodies against CD11c and MHC-II, and analyzed by flow cytometry. Data are mean-fold induction  $\pm$  SEM from three independent experiments analyzed by one-way ANOVA with Tukey's post-hoc multiple comparison test.

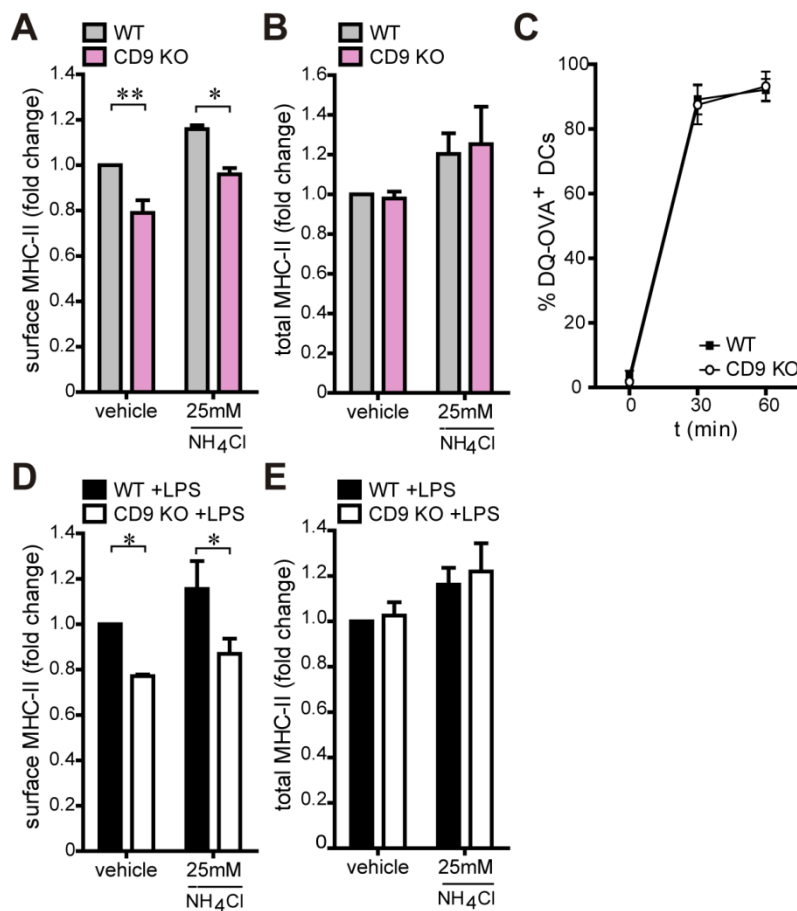

### Supplemental Figure 3

**Supp. Fig. 3. Antigen proteolytic processing is not affected in CD9 KO MoDCs.** (A-B) Immature WT and CD9 KO MoDCs were treated with 25mM of NH<sub>4</sub>Cl or with the vehicle for 1h at 37°C, and (A) surface and (B) total MHC-II expression in CD11c<sup>+</sup> cells was analyzed by flow cytometry. Data are mean-fold induction  $\pm$  SEM from three independent experiments analyzed by one-way ANOVA with Tukey's post-hoc multiple comparison test. (C) Immature WT and CD9 KO DCs were incubated for

different times with DQ-OVA, washed and the percentage of DQ-OVA<sup>+</sup> cells was analyzed by flow cytometry. Data are means  $\pm$  SEM from four independent experiments analyzed by two-way ANOVA with Bonferroni's post-hoc multiple comparison test. (D-E) LPS-matured WT and CD9 KO DCs were analyzed as in A-B. Data are mean-fold induction  $\pm$  SEM from three independent experiments analyzed by one-way ANOVA with Tukey's post-hoc multiple comparison test.

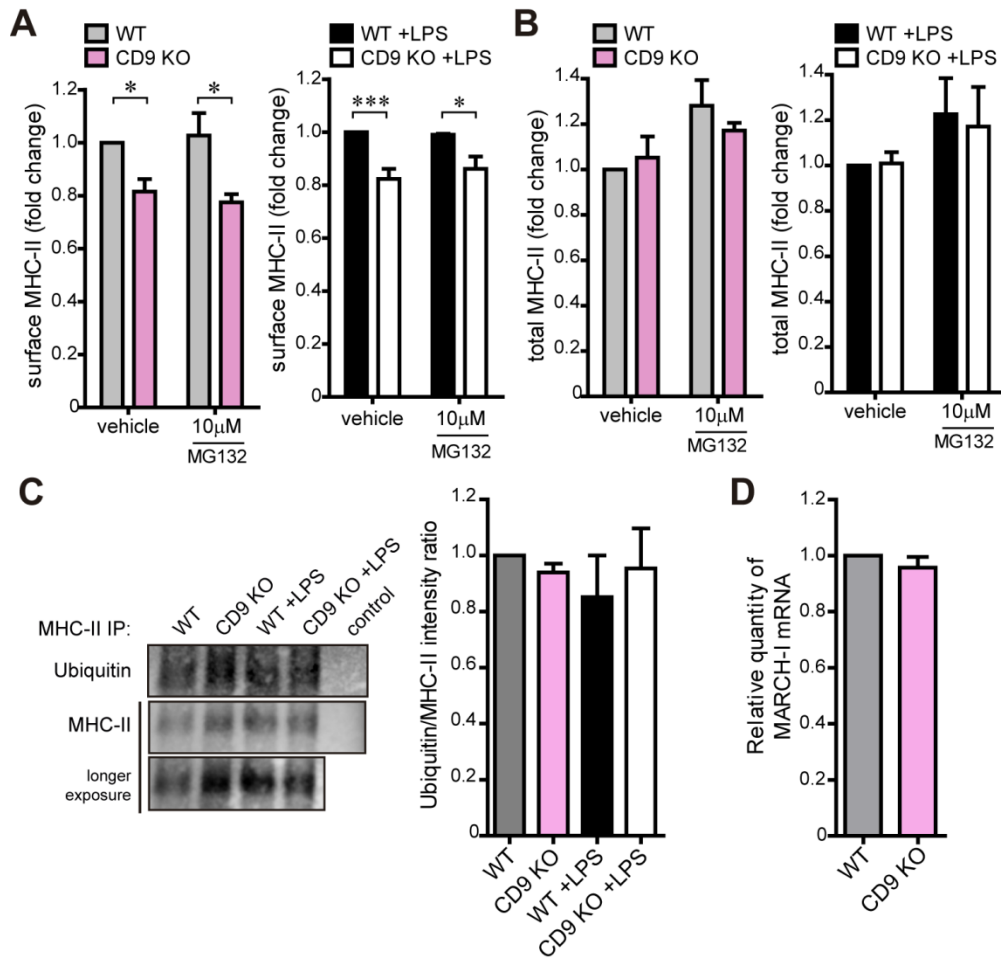

### Supplemental Figure 4

**Supp. Fig. 4. CD9 deficiency does not affect MHC-II ubiquitination.** (A-B) Immature and LPS-matured WT and CD9 KO MoDCs were treated with 10 $\mu$ M of MG132 or with the vehicle for 4h at 37°C, and (A) surface and (B) total MHC-II expression in CD11c<sup>+</sup> cells were analyzed by flow cytometry. Data are mean-fold induction  $\pm$  SEM from three independent experiments analyzed by one-way ANOVA with Tukey's post-hoc multiple comparison test. (C) Cell lysates from immature and LPS-matured WT and CD9 KO MoDCs were immunoprecipitated with an anti-MHC-II antibody (M5/114), and ubiquitinated proteins detected after membrane incubation with anti-ubiquitin antibodies. Membranes were re-probed

with MHC-II antibody for loading measurement. In the control lane the beads were incubated only with cell lysates from WT DCs. The blots shown are from a representative experiment out of three. Graph shows the mean-fold induction  $\pm$  SEM from three independent experiments analyzed by one-way ANOVA with Tukey's post-hoc multiple comparison test. **(D)** Total mRNA was extracted from immature WT and CD9 KO DCs pellets. The amount of MARCH-I mRNA was quantified by RT-qPCR relative to  $\beta$ -actin and YHAWZ controls. Data are mean-fold induction  $\pm$  SEM from two independent experiments analyzed by Student *t*-test.
